# Supplementary material
Source: PubMed Central journal article supplement (PMC2708834)
Supplement: supp_M900490200_Suppl_Klein_et_al._2009.pdf [file supp_M900490200_Suppl_Klein_et_al._2009.pdf]

**Table S1.** Oligonucleotides used in this study.

ArnB\_for 5'-GAA CGG TCG CAG AAT TCA GCA TGA CGA AAC AA-3'  
ArnB\_rev 5'-CCG CCA TTG AAT ACG GAT CCA CTT ATA TTT GCT A-3'  
EptA BasR BasS\_for 5'-CCA GCT CAG CAG GAA TTC ACC AAA CGC GAC CAA-3'  
EptA BasR BasS\_rev 5'-CAA CAT CAC GGT GGA TCC ATC GAA CAA AGT GCG-3'  
LpxL-1\_for 5'-GCG ACA ATA CAT ACA ATT GCC CGA ATA GGT TGA AAA ACA GGA TTG  
ATA TGC ATA TGA ATA TCC TCC TTA G-3'  
LpxL-2\_rev 5'-GCC ATT CTG AAG CAT CCG GCA TGG GAG ATT TAA TAG CGT GAA GGA  
ACG CCG TGT AGG CTG GAG CTG CTT C-3'  
LpxL-3\_for 5'-GCG ACA ATA CAT ACA ATT GCC-3'  
LpxL-4\_rev 5'-GGG ATT TGC TGT GGT AAT GC-3'  
LpxM-1\_for 5'-CTA CAC TAT CAC CAG ATT GA-3'  
LpxM-2\_rev 5'-CCT ACA GTT CAA TGA TAG TTC AAC-3'  
LpxP-1\_for 5'-CAT GGA ATC TTC TGC GAT ACA ACA ATT CGT ATC TAC AGA AGG TAA CTA  
TGC ATA TGA ATA TCC TCC TTA G-3'  
LpxP-2\_rev 5'-TTG AGG AGG GAA AGA GTA AGA GCA GTT TGT TAA ATG TAC AAC GAC  
GAT TCG TGT AGG CTG GAG CTG CTT C-3'  
LpxPsp\_for 5'-CAT GGA ATC TTC TGC GAT ACA ACA ATT CGT ATC TAC AGA AGG TAA CTA  
TGG CAC CTT GCC GTA GAA GAA C-3'  
LpxPsp\_rev-2 5'-TTG AGG AGG GAA AGA GTA AGA GCA GTT TGT TAA ATG TAC AAC GAC  
GAT TCT AAC GCT TGA GTT AAG CCG C-3'  
RfaC\_for 5'-ACT CAA CGC GCT ATT GTT ACA AGA GGA AGC CTG ACG GAT GCA TAT GAA  
TAT CCT CCT TAG-3'  
RfaC\_rev 5'-ATG TTA GCA TGT TTT ACC TTT ATA ATG ATG ATA ACT TTT CGT GTA GGC  
TGG AGC TGC TTC-3'  
YcaI\_for 5'-CAA CCG CTC AAC AAA GTT GCA CAC TTT CCA TAA ACA GGG AGG GGT GCA  
TGG CAC CTT GCC GTA GAA GAA C-3'  
YcaI\_rev 5'-ACC AGC ATT TGT TGA AAT AGC CGC ATA TTC TAC CCG TTA TCC ACT GGC  
ACT AAC GCT TGA GTT AAG CCG C-3'  
YcaI\_rev 5'-TAA CGC CTT CCG GTT CAA GAT TAT GCC AGT GGA GCC AGG GGA TAA TCA  
GTT AAC GCT TGA GTT AAG CCG C-3'  
Yca2\_rev 5'-TAA CGC CTT CCG GTT CAA GAT TAT GCC AGT GGA GCC AGG GGA TAA TCA  
GTT AAC GCT TGA GTT AAG CCG C-3'  
MsbA1 5'-AGT GGA TAA CGG GTA GAA TAT G-3'  
MsbA2 5'-CAA ATG CTG AAG GGC CAC A-3'  
MsbA3 5'-CCG CCA CAA AGG GGA TTC A-3'  
kdt-1\_for 5'-GCT AAA TAC ATA GAA TCC CCA GCA CAT CCA TAA GTC AGC TAT TTA CTA  
TGC ATA TGA ATA TCC TCC TTA G-3'  
kdt-2-rev 5'-GAT AAA TCG CCC GTT TTT GCA TAA CAA CCT CAA TGC GTT TTC GGT GGC  
AGG TGT AGG CTG GAG CTG CTT C-3'  
KdtA\_for 5'-GCT AAA TAC ATA GAA TCC CCA GCA CAT CCA TAA GTC AGC TAT TTA CTA  
TGA TTC CGG GGA TCC GTC GAC C-3'  
KdtA\_rev 5'-GAT AAA TCG CCC GTT TTT GCA TAA CAA CCT CAA TGC GTT TTC GGT GGC  
AGT GTA GGC TGG AGC TGC TTC G-3'
